# Supplementary material for: Accelerating assimilation development for new observing systems using EFSO
Source: Copernicus journal article supplement (doi:10.5194/npg-25-129-2018), 2018-03-01
Supplement: Supplementary file 1 [file npg-25-129-2018-supplement.pdf]

Supplement of Nonlin. Processes Geophys., 25, 129–143, 2018  
<https://doi.org/10.5194/npg-25-129-2018-supplement>  
© Author(s) 2018. This work is distributed under  
the Creative Commons Attribution 4.0 License.

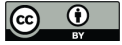

*Supplement of*

## **Accelerating assimilation development for new observing systems using EFSO**

**Guo-Yuan Lien et al.**

*Correspondence to:* Guo-Yuan Lien ([guo-yuan.lien@riken.jp](mailto:guo-yuan.lien@riken.jp))

The copyright of individual parts of the supplement might differ from the CC BY 4.0 License.

# EFSO computed using 8 members

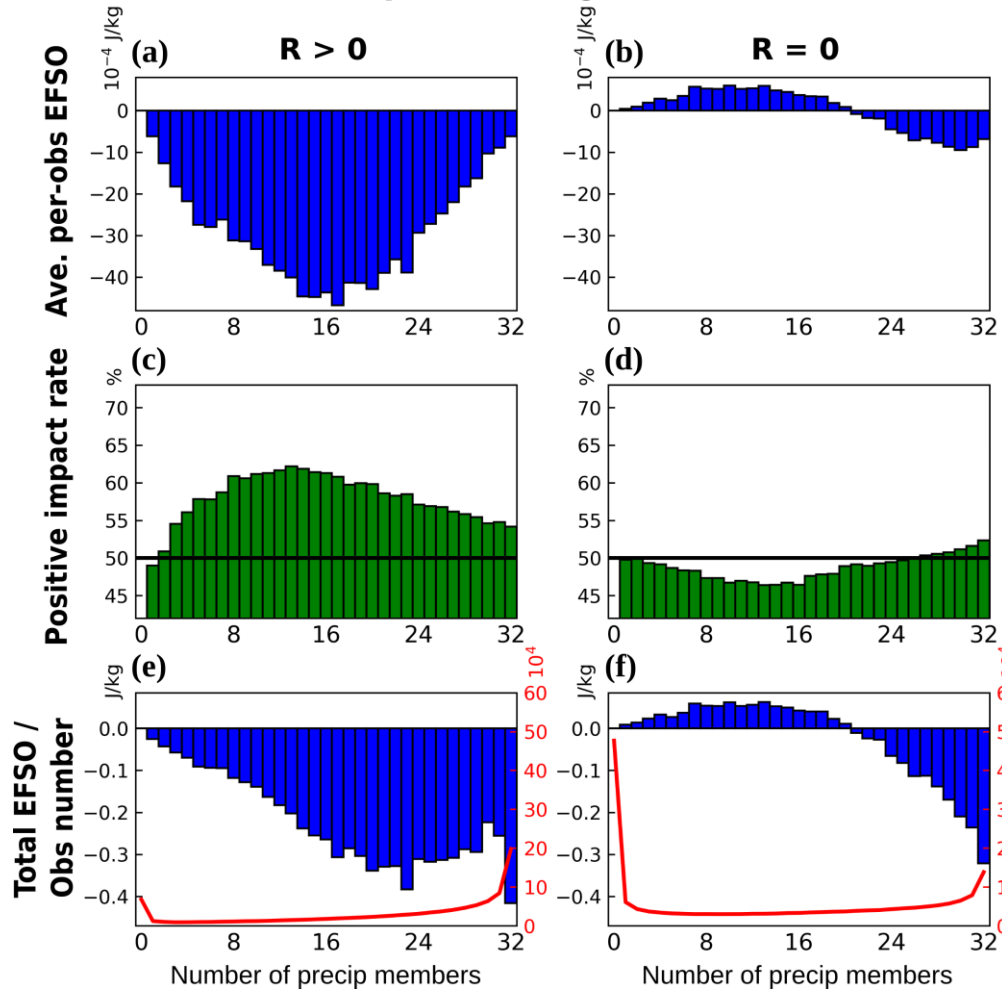

Figure S1: Same as Fig. 3, but the EFSO is computed using only the first 8 members.

## EFSO computed using 16 members

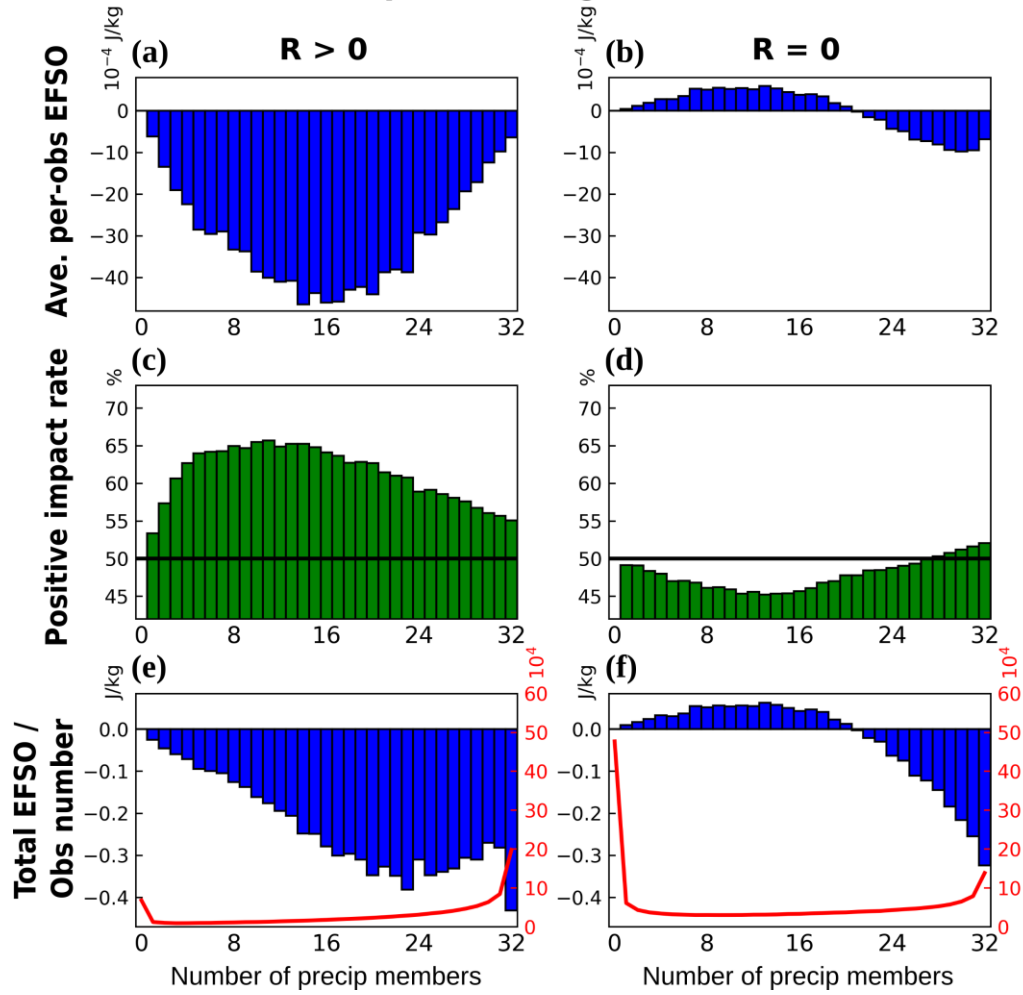

Figure S2: Same as Fig. 3, but the EFSO is computed using only the first 16 members.

### EFSO computed using 24 members

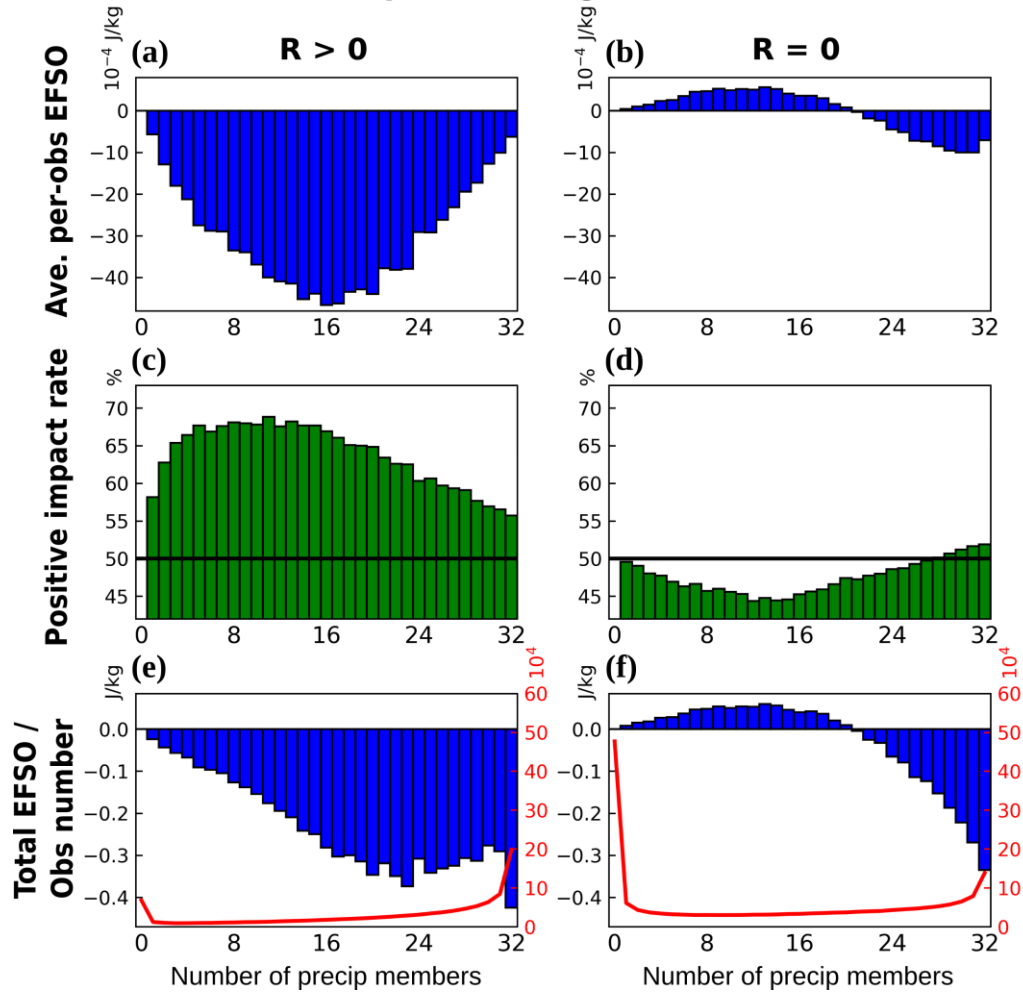

Figure S3: Same as Fig. 3, but the EFSO is computed using only the first 24 members.
